# Supplementary material for: Spatial Overlap and Habitat Selection of Corvid Species in European Cities
Source: MDPI journal article supplement (doi:10.3390/ani13071192), 2023-03-29

## SUPPLEMENTARY MATERIAL

Table S1. The surveyed cities along with their latitudes, longitudes, populations, population densities (/km<sup>2</sup>) and the number of point counts in each. When available, the population densities of the core area of the cities were also included (inside parentheses). The population and population densities were obtained from the respective Wikipedia pages of each city.

| Country           | City         | Latitude  | Longitude | Population           | Population density (/km <sup>2</sup> ) | Sample size |
|-------------------|--------------|-----------|-----------|----------------------|----------------------------------------|-------------|
| Czech Republic    | Prague       | 50.07346  | 14.49901  | 1,275,406            | 2,570                                  | 119         |
| Estonia           | Tartu        | 58.3836   | 26.72062  | 91,407               | 2412                                   | 99          |
| Finland           | Jyväskylä    | 62.243    | 25.7617   | 144,447<br>(117,974) | 123<br>(1,189)                         | 89          |
|                   | Rovaniemi    | 66.503059 | 25.726967 | 64,194<br>(53,361)   | 8 (904)                                | 83          |
|                   | Turku        | 60.45     | 22.254    | 195,301              | 795                                    | 85          |
| France            | Poitiers     | 46.56191  | 0.312026  | 89,212               | 2,119                                  | 100         |
| Greece            | Athens       | 37.97294  | 23.7334   | 3,059,764            | 7427                                   | 96          |
|                   | Ioannina     | 39.65587  | 20.851312 | 112,486<br>(80,371)  | 279 (2371)                             | 93          |
| Hungary           | Budapest     | 47.47956  | 19.04851  | 1,752,286            | 3,336                                  | 86          |
| Italy             | Pesaro       | 43.912476 | 12.915549 | 95,000               | 749                                    | 55          |
| Netherlands       | Groningen    | 53.219383 | 53.219383 | 233,218              | 1,256                                  | 99          |
| Poland            | Poznan       | 52.41151  | 16.817517 | 529,410              | 2,022                                  | 100         |
|                   | Zielona Góra | 51.90575  | 15.507097 | 140,403              | 510                                    | 60          |
| Spain             | Granada      | 37.19989  | -3.629306 | 232,208              | 2,638                                  | 99          |
|                   | Madrid       | 40.44021  | -3.687409 | 3,223,334            | 5,334                                  | 99          |
|                   | Toledo       | 39.8614   | -4.042886 | 84,282               | 360                                    | 100         |
| Total sample size |              |           |           |                      |                                        | 1462        |

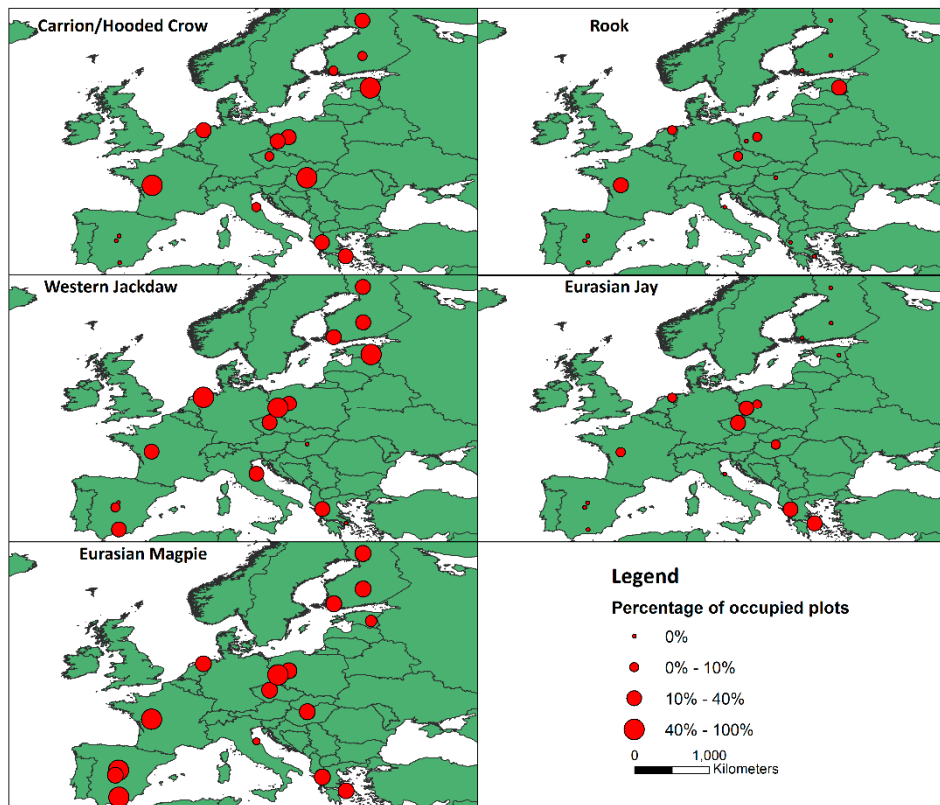

Figure S1. The distribution of the different corvid species in the surveyed cities. The size of the circles indicates the percentage of occupied point counts in each city.

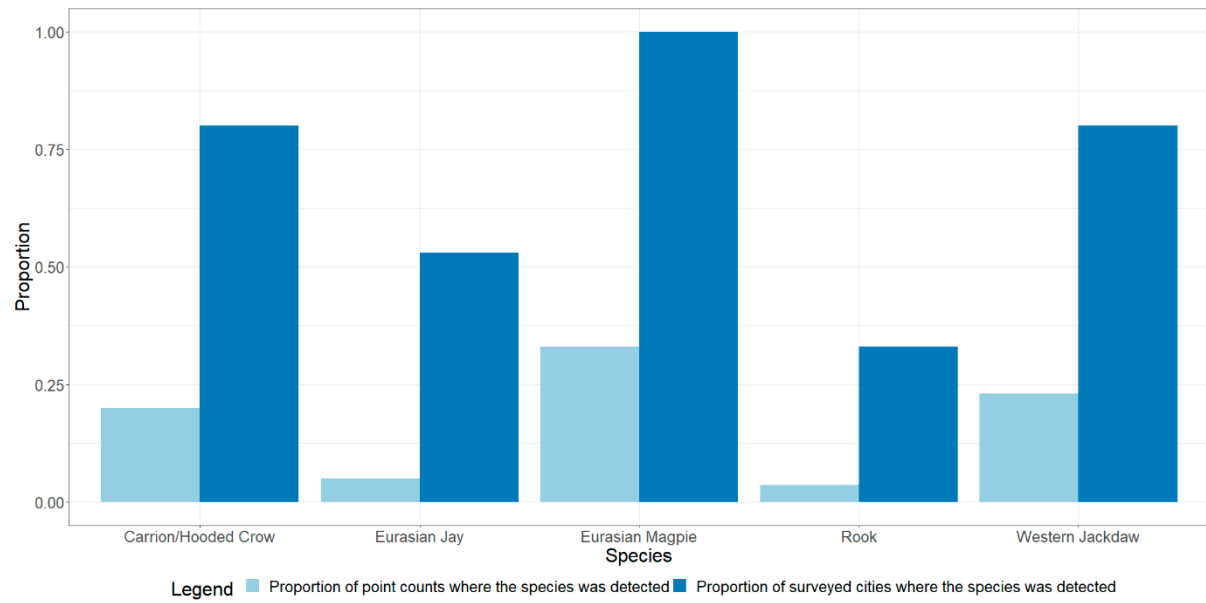

Figure S2. Proportion of detections of each corvid species at point counts (light blue bars) and cities (dark blue bars).

Figure S3. Frequency of point counts with a certain corvid abundance in each of the surveyed cities.

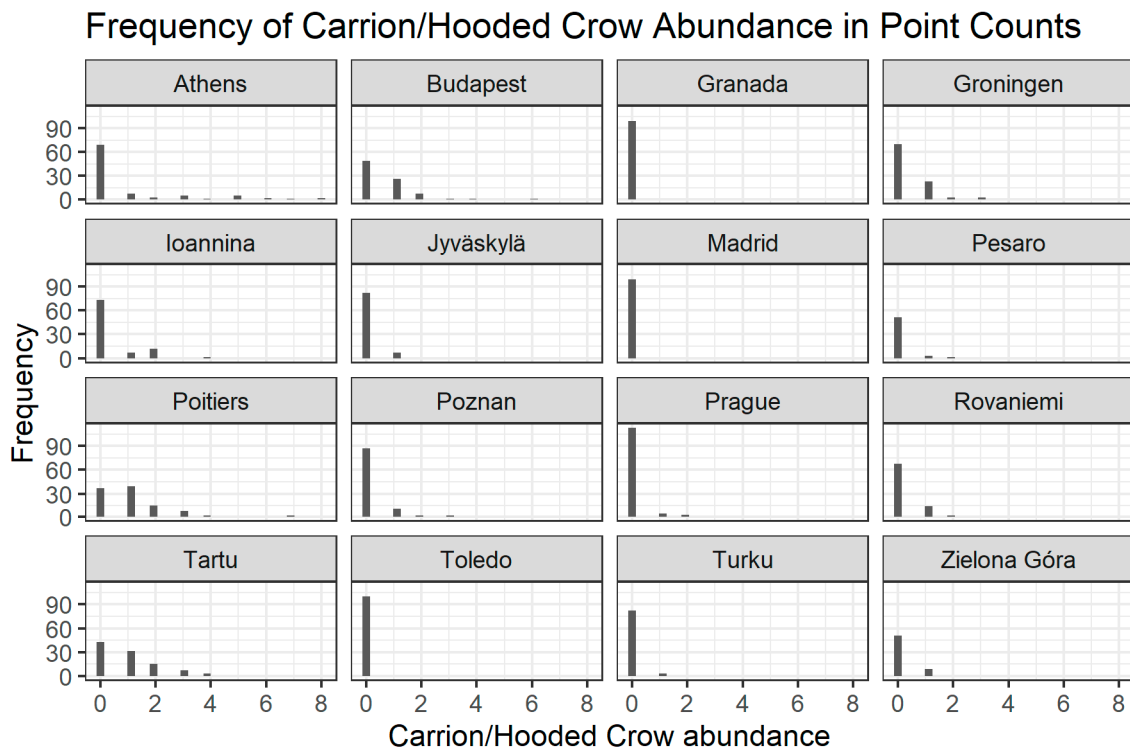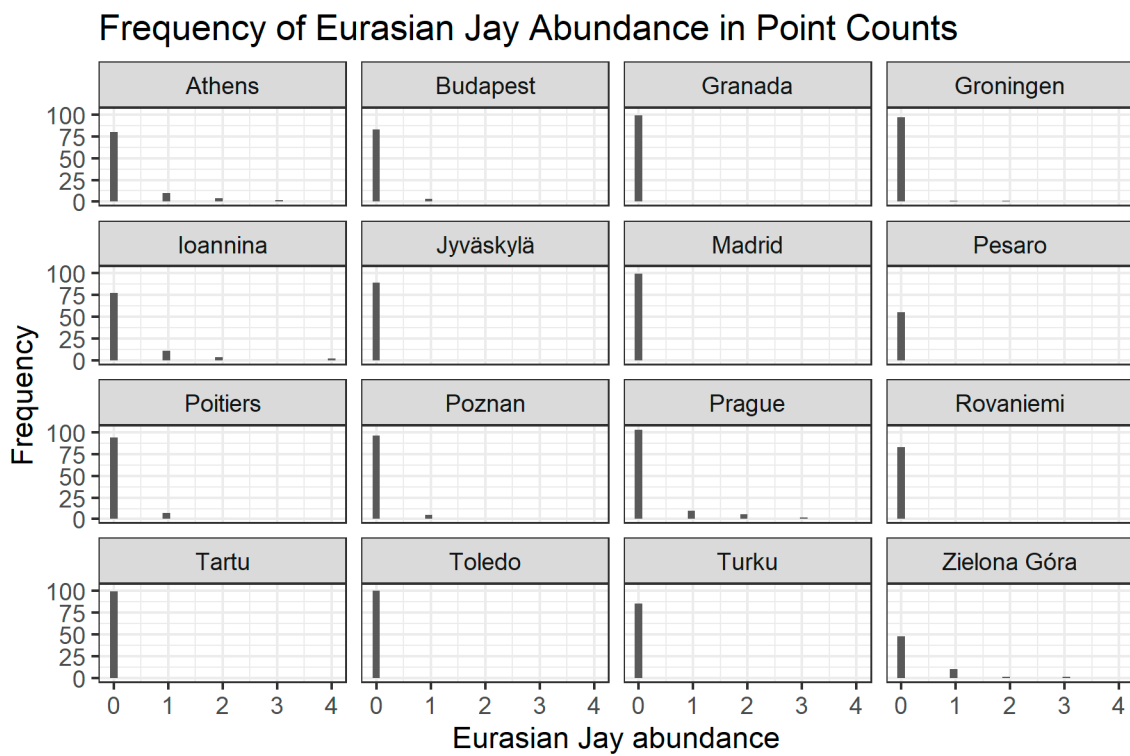

## Frequency of Eurasian Magpie Abundance in Point Counts

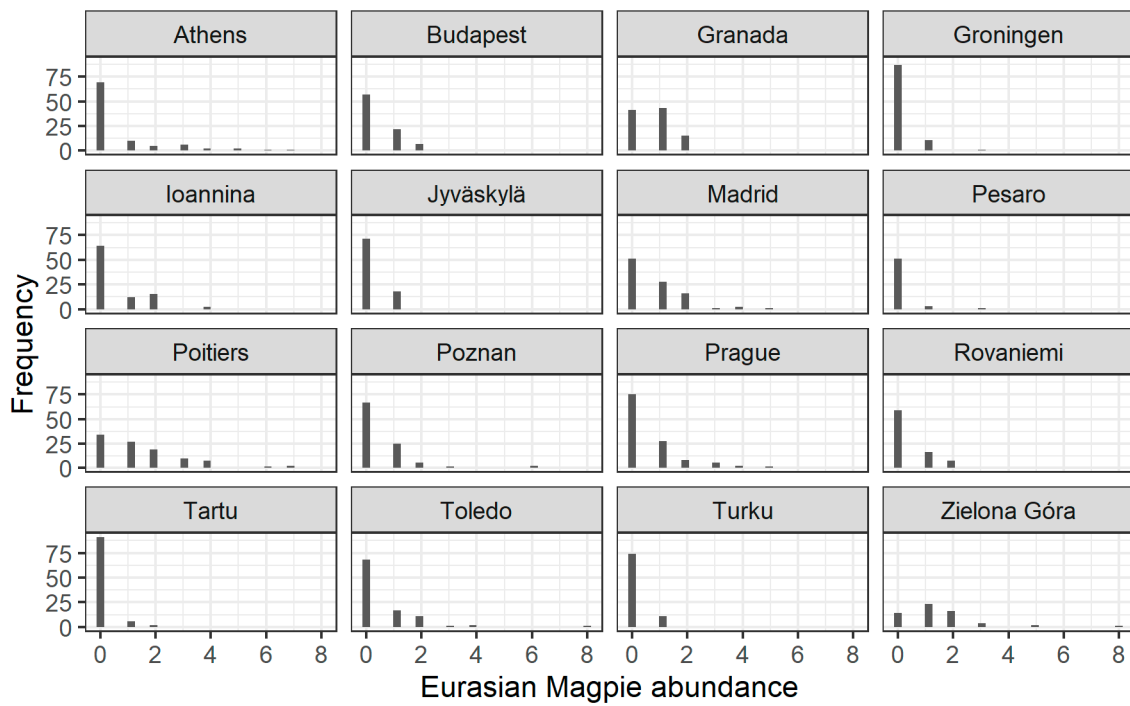

## Frequency of Rook Abundance in Point Counts

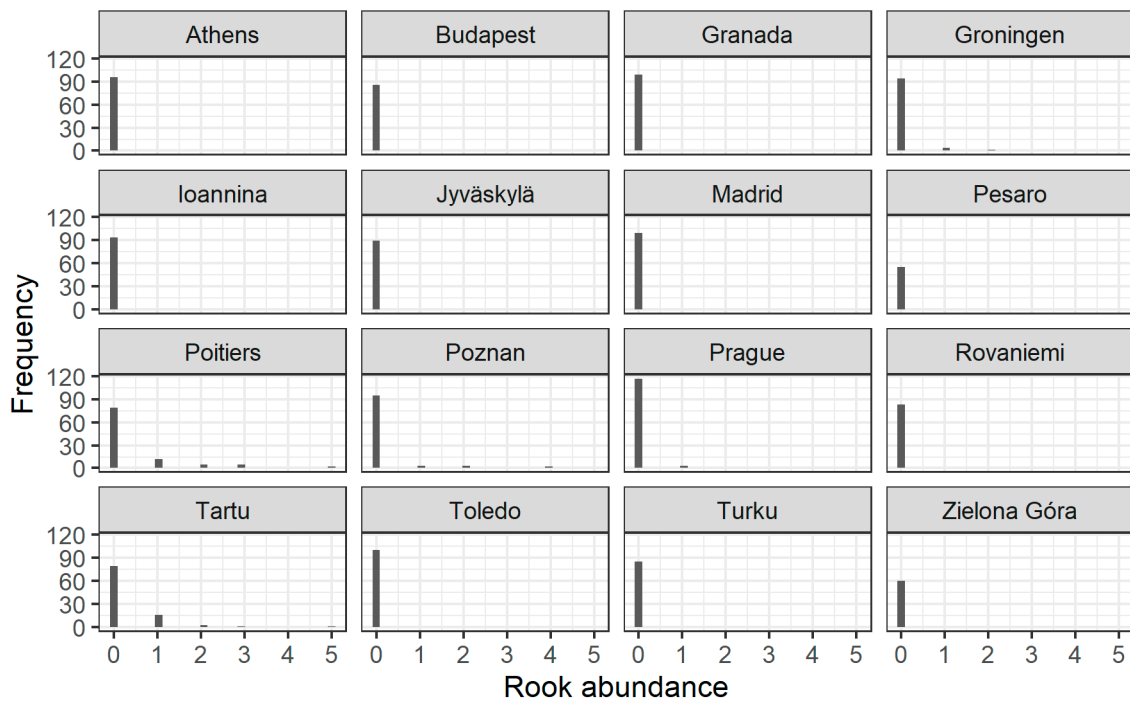

## Frequency of Western Jackdaw Abundance in Point Counts

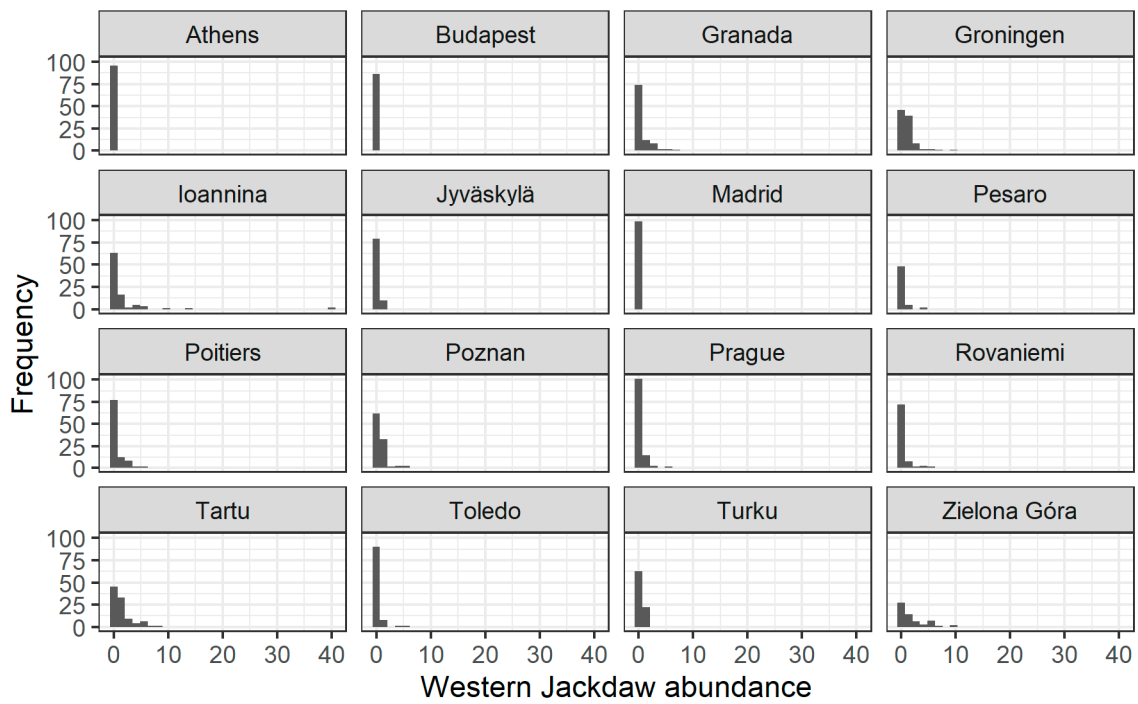

Supplement: s1 [file s1]
